# Supplementary material for: HASTER is a transcriptional stabilizer of HNF1A
Source: bioRxiv or medRxiv preprint supplement (doi:10.1101/2021.05.12.443907), 2021-05-13
Supplement: Supplementary file [file media-2.pdf]

# Supplementary Fig. 1

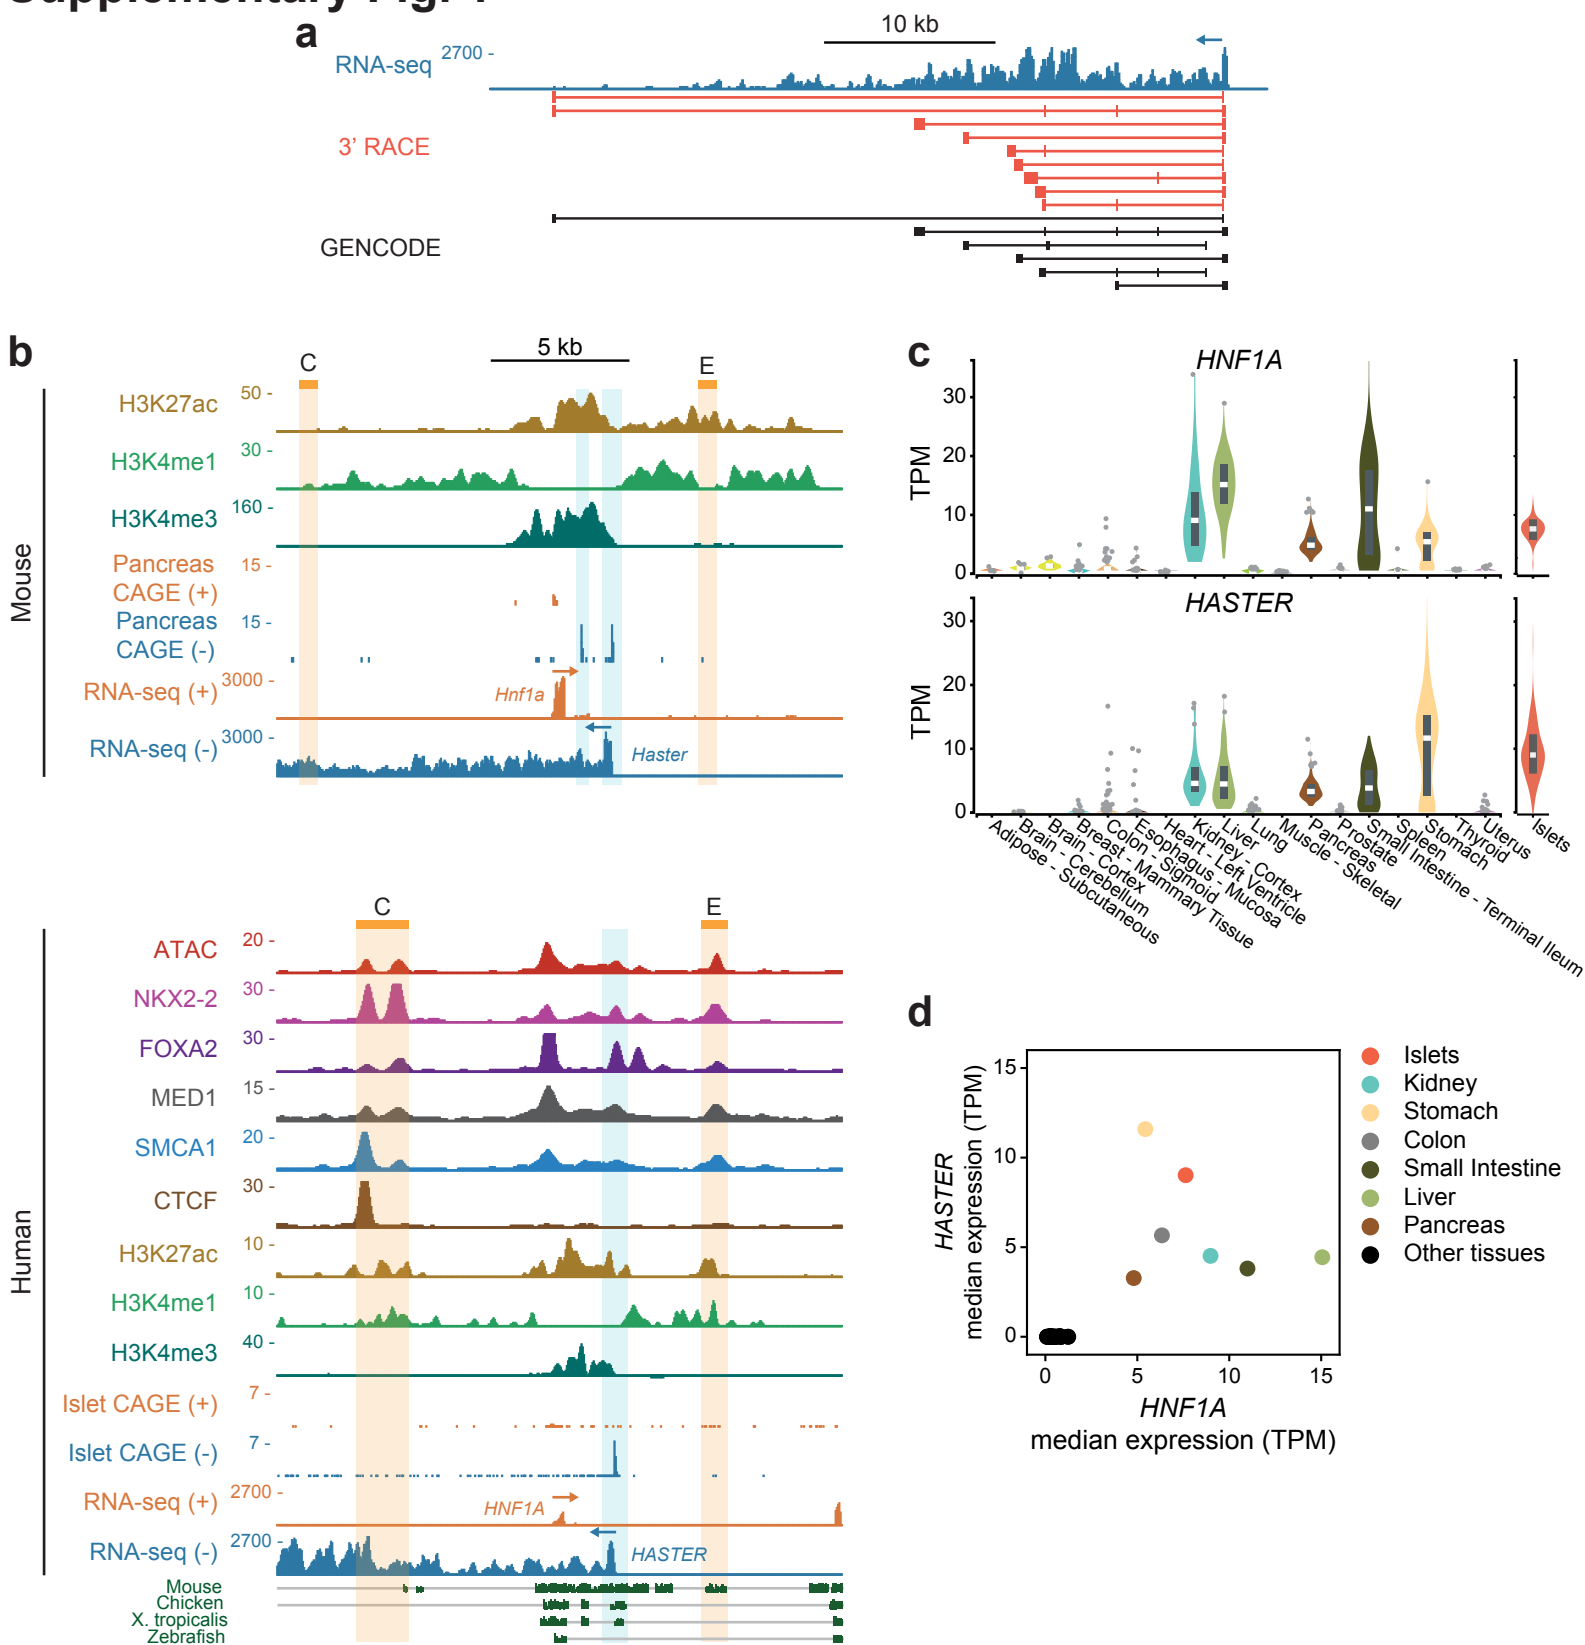

**Supplementary Fig. 1. *HASTER* gene structure and expression.** **a**, *HASTER* isoforms detected by 3' Rapid Amplification of cDNA Ends. **b**, Chromatin and RNA maps in mouse (top) and human islets (bottom). Human CAGE is from islets, and mouse CAGE is from pancreas. The two mouse *Haster* transcriptional start sites are highlighted in blue, although only one transcriptional origin is apparent in human islets. The E1 islet enhancer, and CTCF bound C region, both of which are bound by islet transcription factors, are highlighted in beige. **c**, *HNF1A* and *HASTER* expression across GTEx human tissues and human islets. Boxes show median and interquartile ranges. **d**, *HASTER* and *HNF1A* median transcript levels across tissues are negatively correlated, with the exception of whole pancreas.

## Supplementary Fig. 2

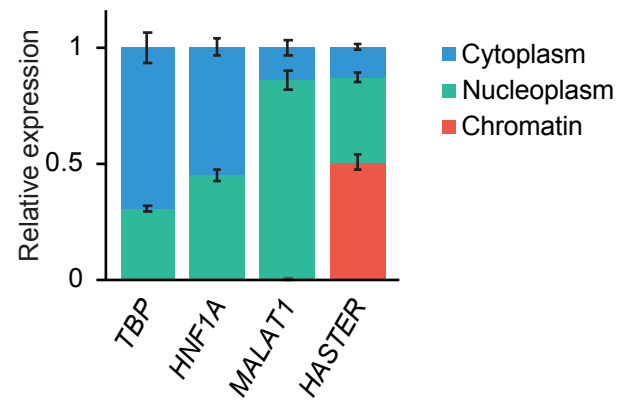

**Supplementary Fig. 2. *HASTER* localizes to the nucleus.** Relative subcellular expression of *HASTER* lncRNA in EndoC- $\beta$ H3 cells, compared to control mRNAs (*TBP* and *HNF1A*) and the nuclear lncRNA *MALAT1*. Mean  $\pm$  s.d., n = 3 biological replicates.

# Supplementary Fig. 3

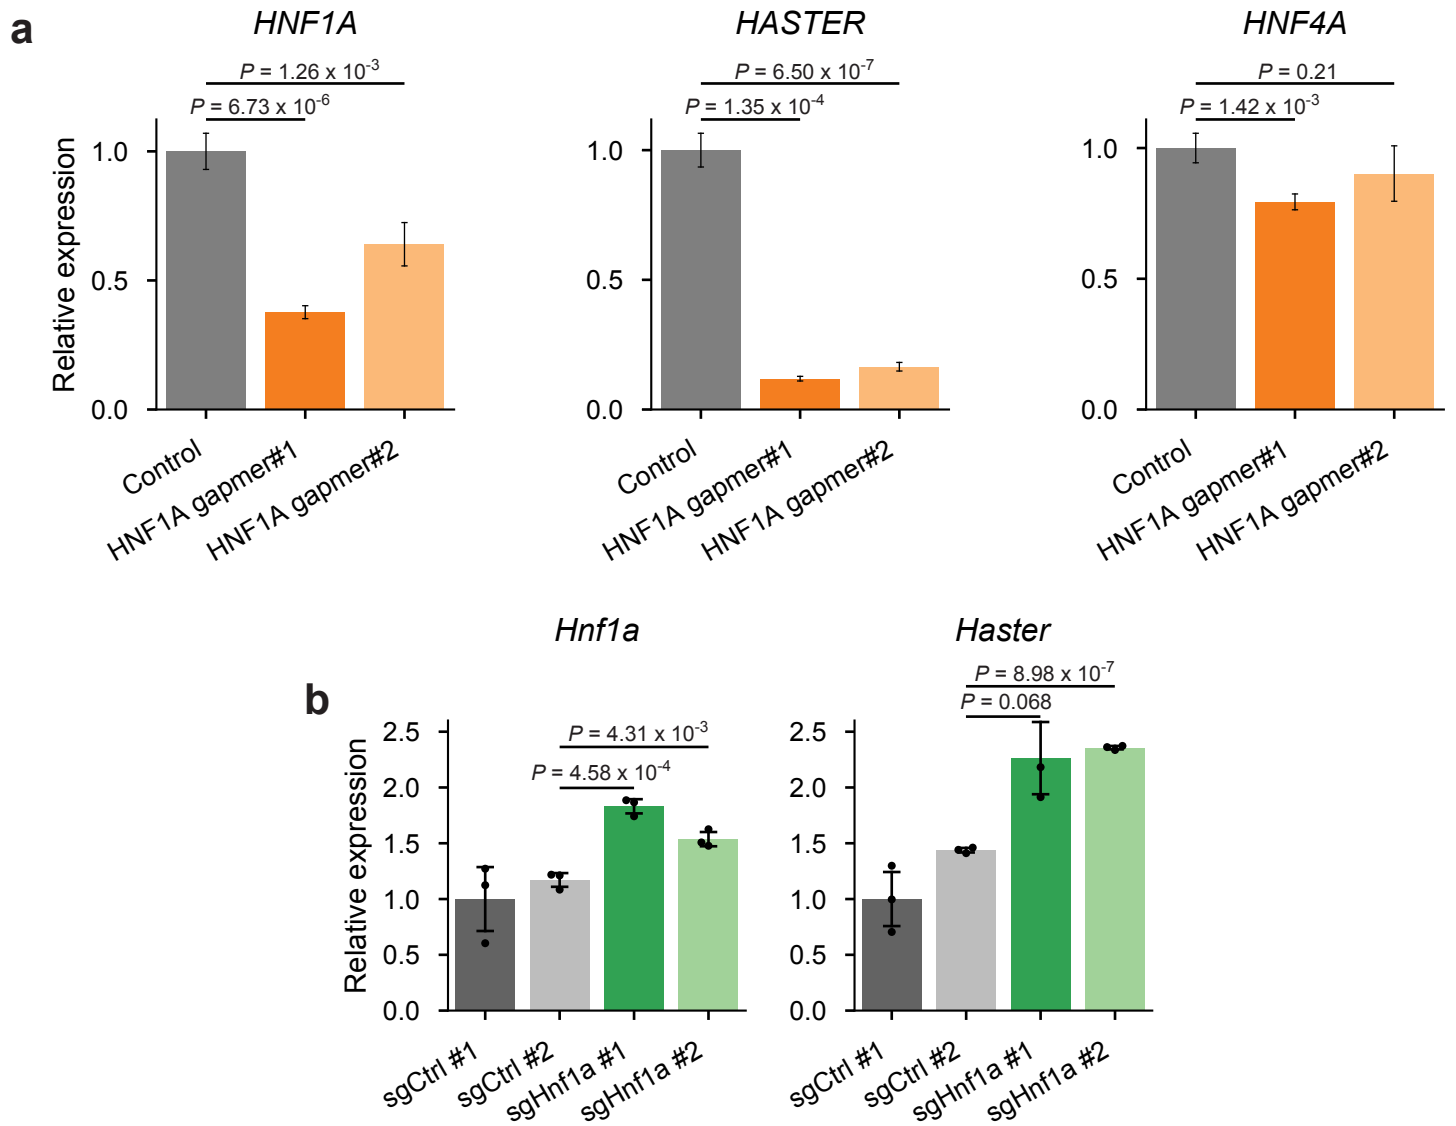

**Supplementary Fig. 3. *HASTER* is sensitive to decreased or increased *HNF1A* expression.** **a**, LNA GapmeR knock-down of *HNF1A* in human EndoC- $\beta$ H3  $\beta$  cells led to decreased *HASTER*, and minor changes in other HNF1A-dependent genes.  $n = 3$  nucleofections, *TBP*-normalized mean  $\pm$  s.d.; two-tailed Student's t-test. **b**, CRISPR-SAM activation of *Hnf1a* in mouse MIN6  $\beta$  cells.  $n = 3$  lentiviral transductions, representative of 2 independent experiments. *Tbp*-normalized mean  $\pm$  s.d.; two-tailed Student's t-test.

# Supplementary Fig. 4

**a**

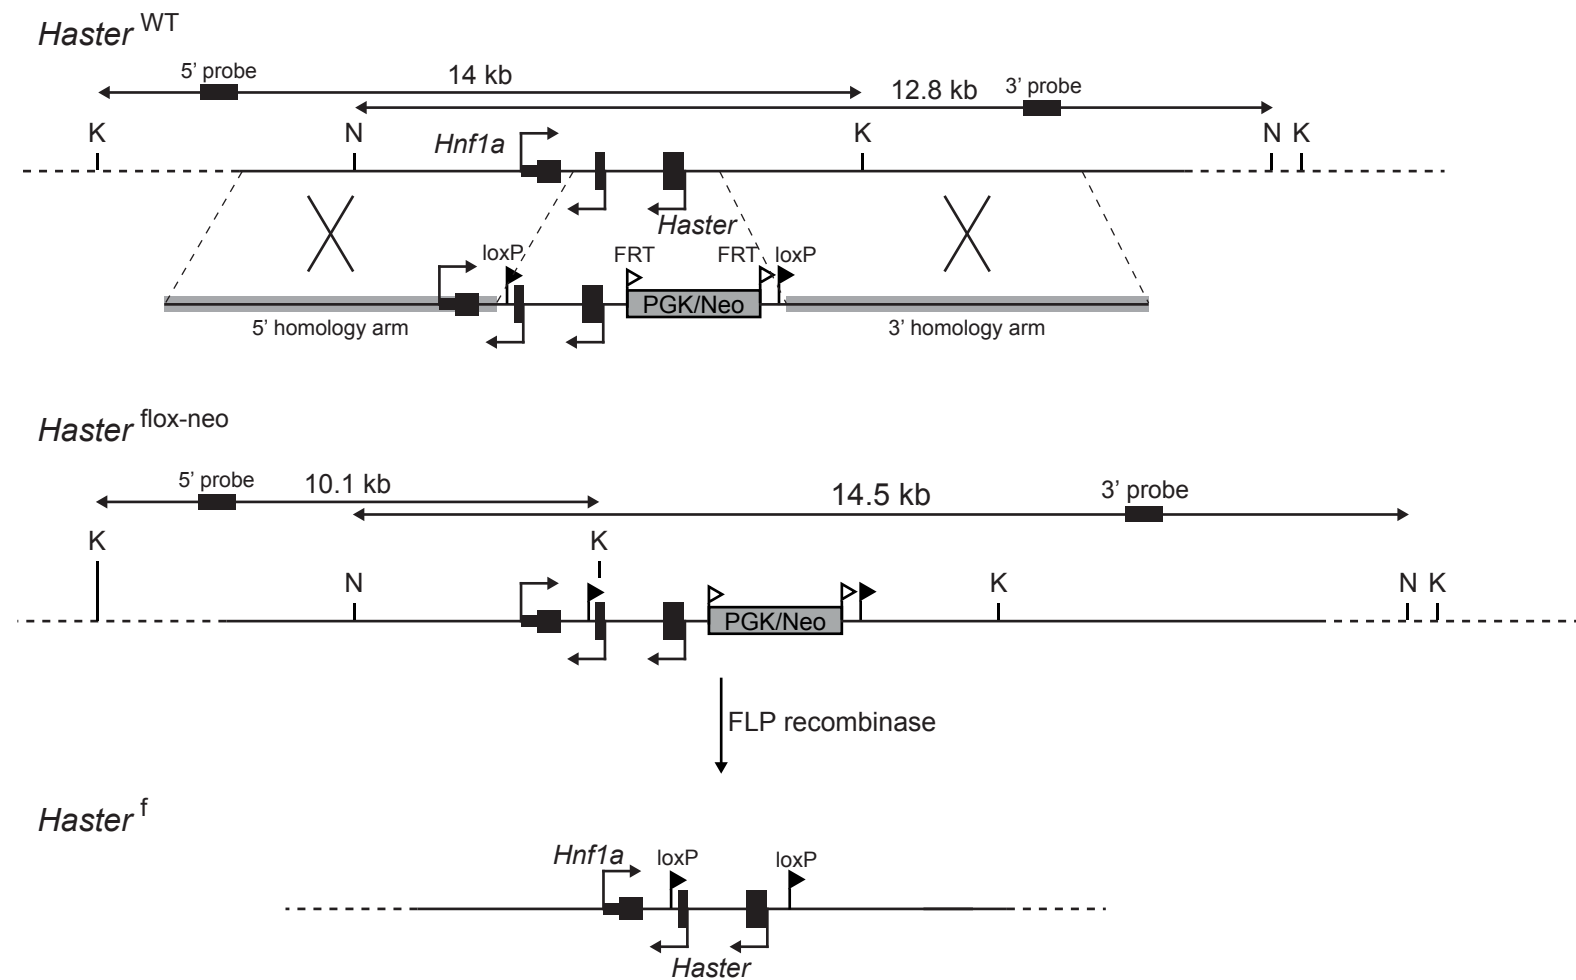

**b**

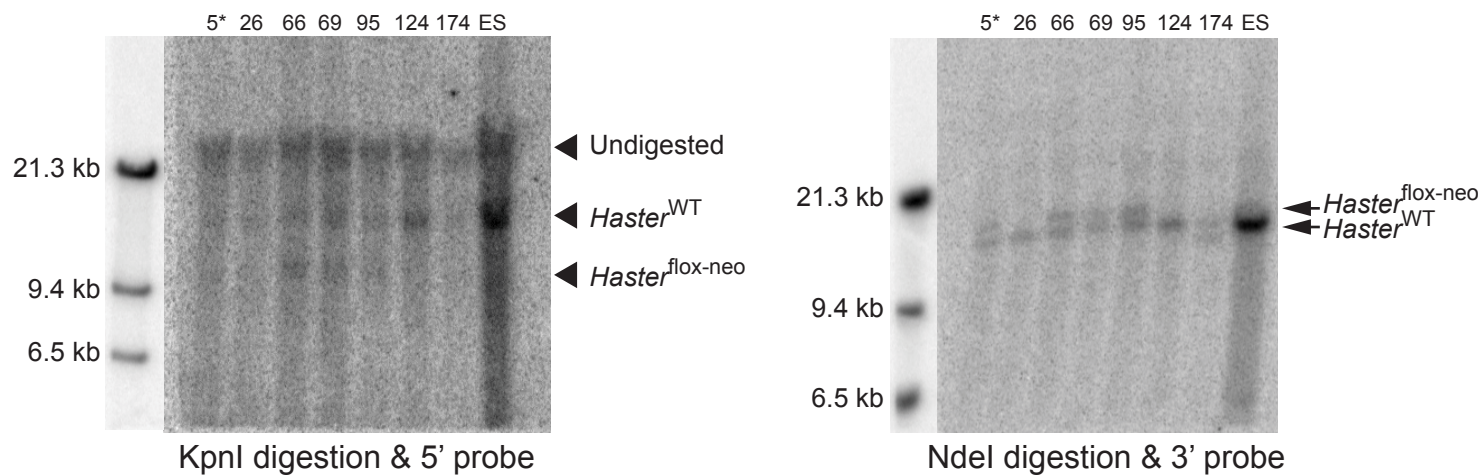

**Supplementary Fig. 4. Conditional mouse *Haster* allele.** **a**, Schematic of the targeted allele, digestion fragments and probes used for Southern blot analysis of different alleles. **b**, Southern blot with KpnI (left) and NdeI (right) digestion. Asterisk, Clone 5 was selected to establish the line. K, KpnI; N, NdeI; ES, parental embryonic stem cell (C57BL/6).



# Supplementary Fig. 5

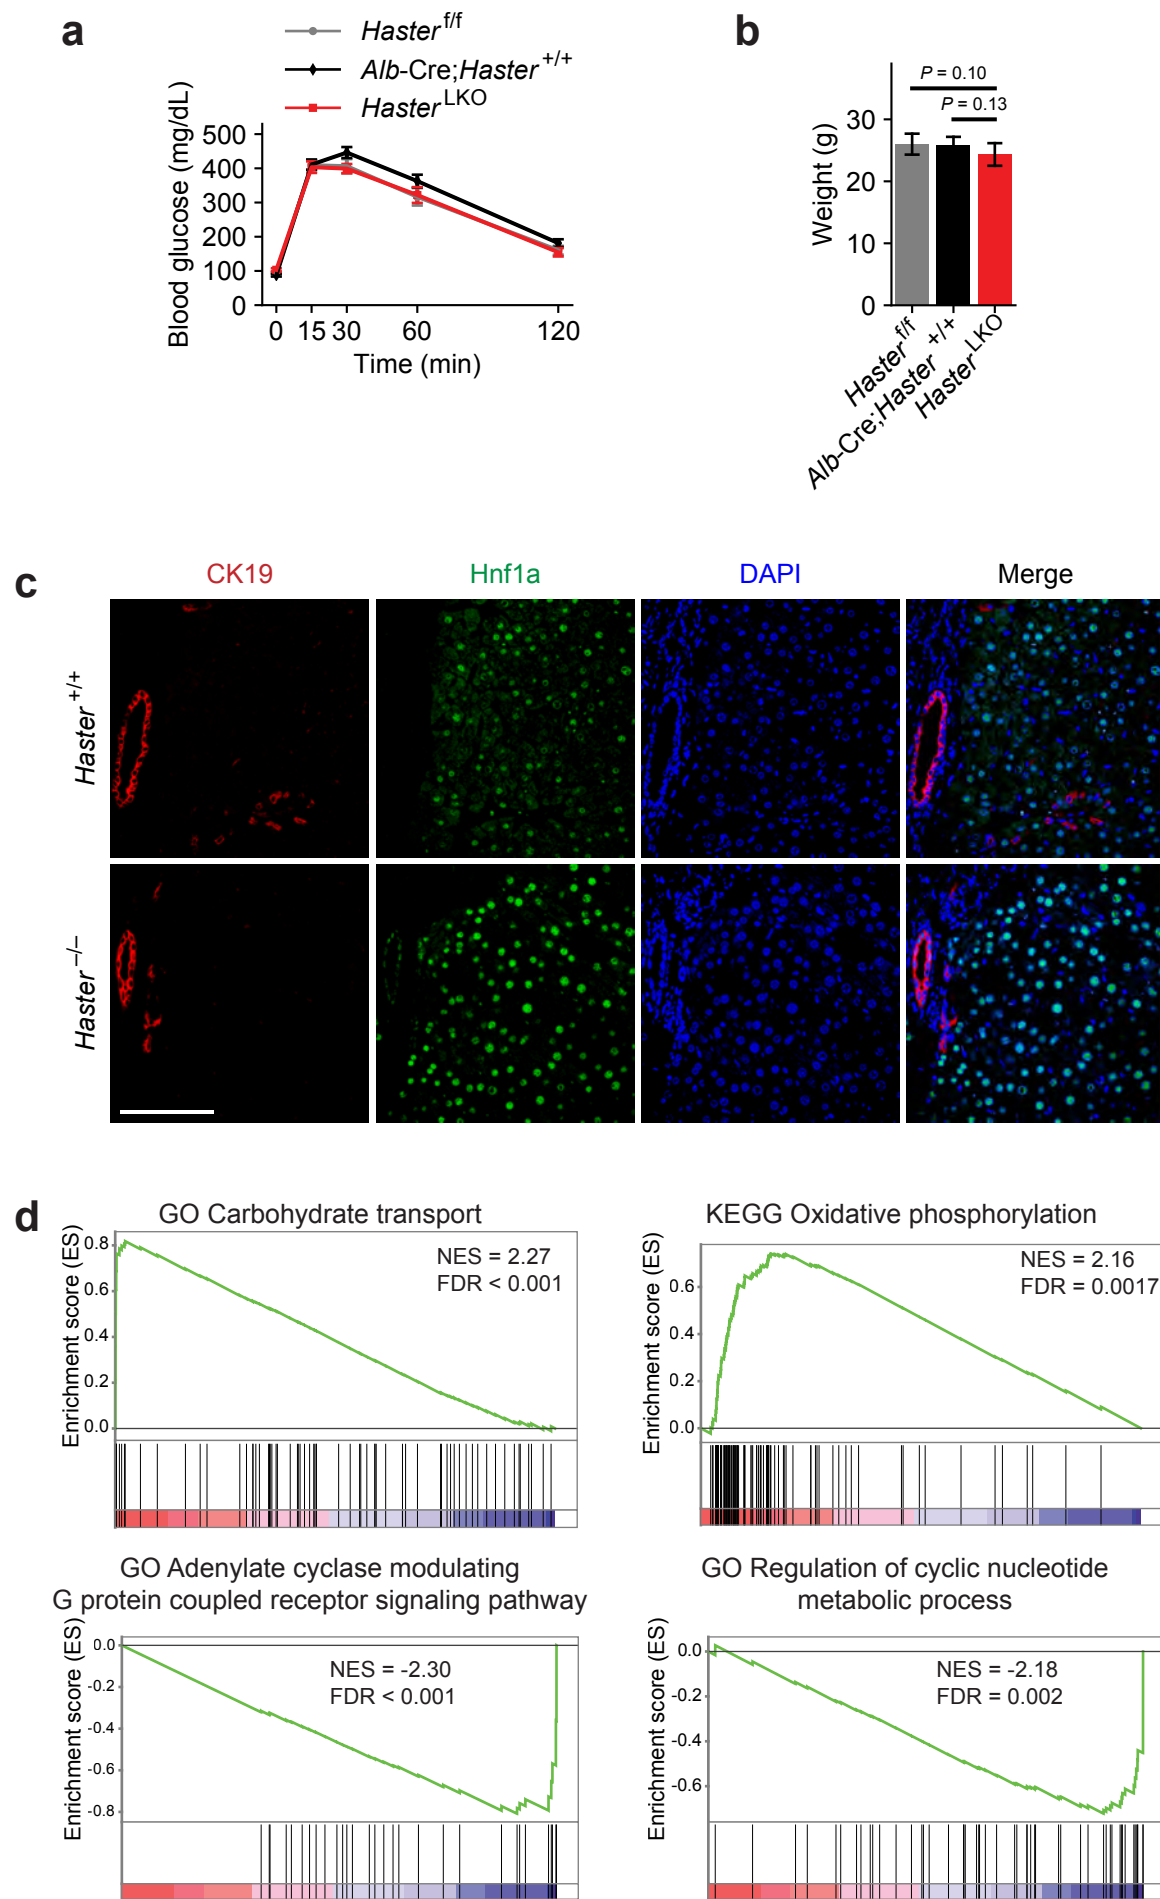

**Supplementary Fig. 5. Phenotypic analysis of *Haster* deletion in liver.** **a**, Intraperitoneal glucose tolerance test in *Haster*<sup>LKO</sup> and control 8-week-old mice. Mean  $\pm$  s.e.m. **b**, Body weight at 8 weeks for *Haster*<sup>LKO</sup> and controls. Mean  $\pm$  s.d.. **a,b**,  $n = 9$  *Haster*<sup>LKO</sup>,  $n = 6$  *Alb-Cre;Haster*<sup>+/+</sup> and  $n = 7$  *Haster*<sup>f/f</sup>, two-tailed Student's t-test. **c**, Immunofluorescence showing HNF1A overexpression in *Haster*<sup>-/-</sup> liver. Scale bar, 100  $\mu$ m. **d**, GSEA displaying the enrichment of functional annotations in *Haster*<sup>LKO</sup> upregulated (top panel) and downregulated (bottom panel) genes.

# Supplementary Fig. 6

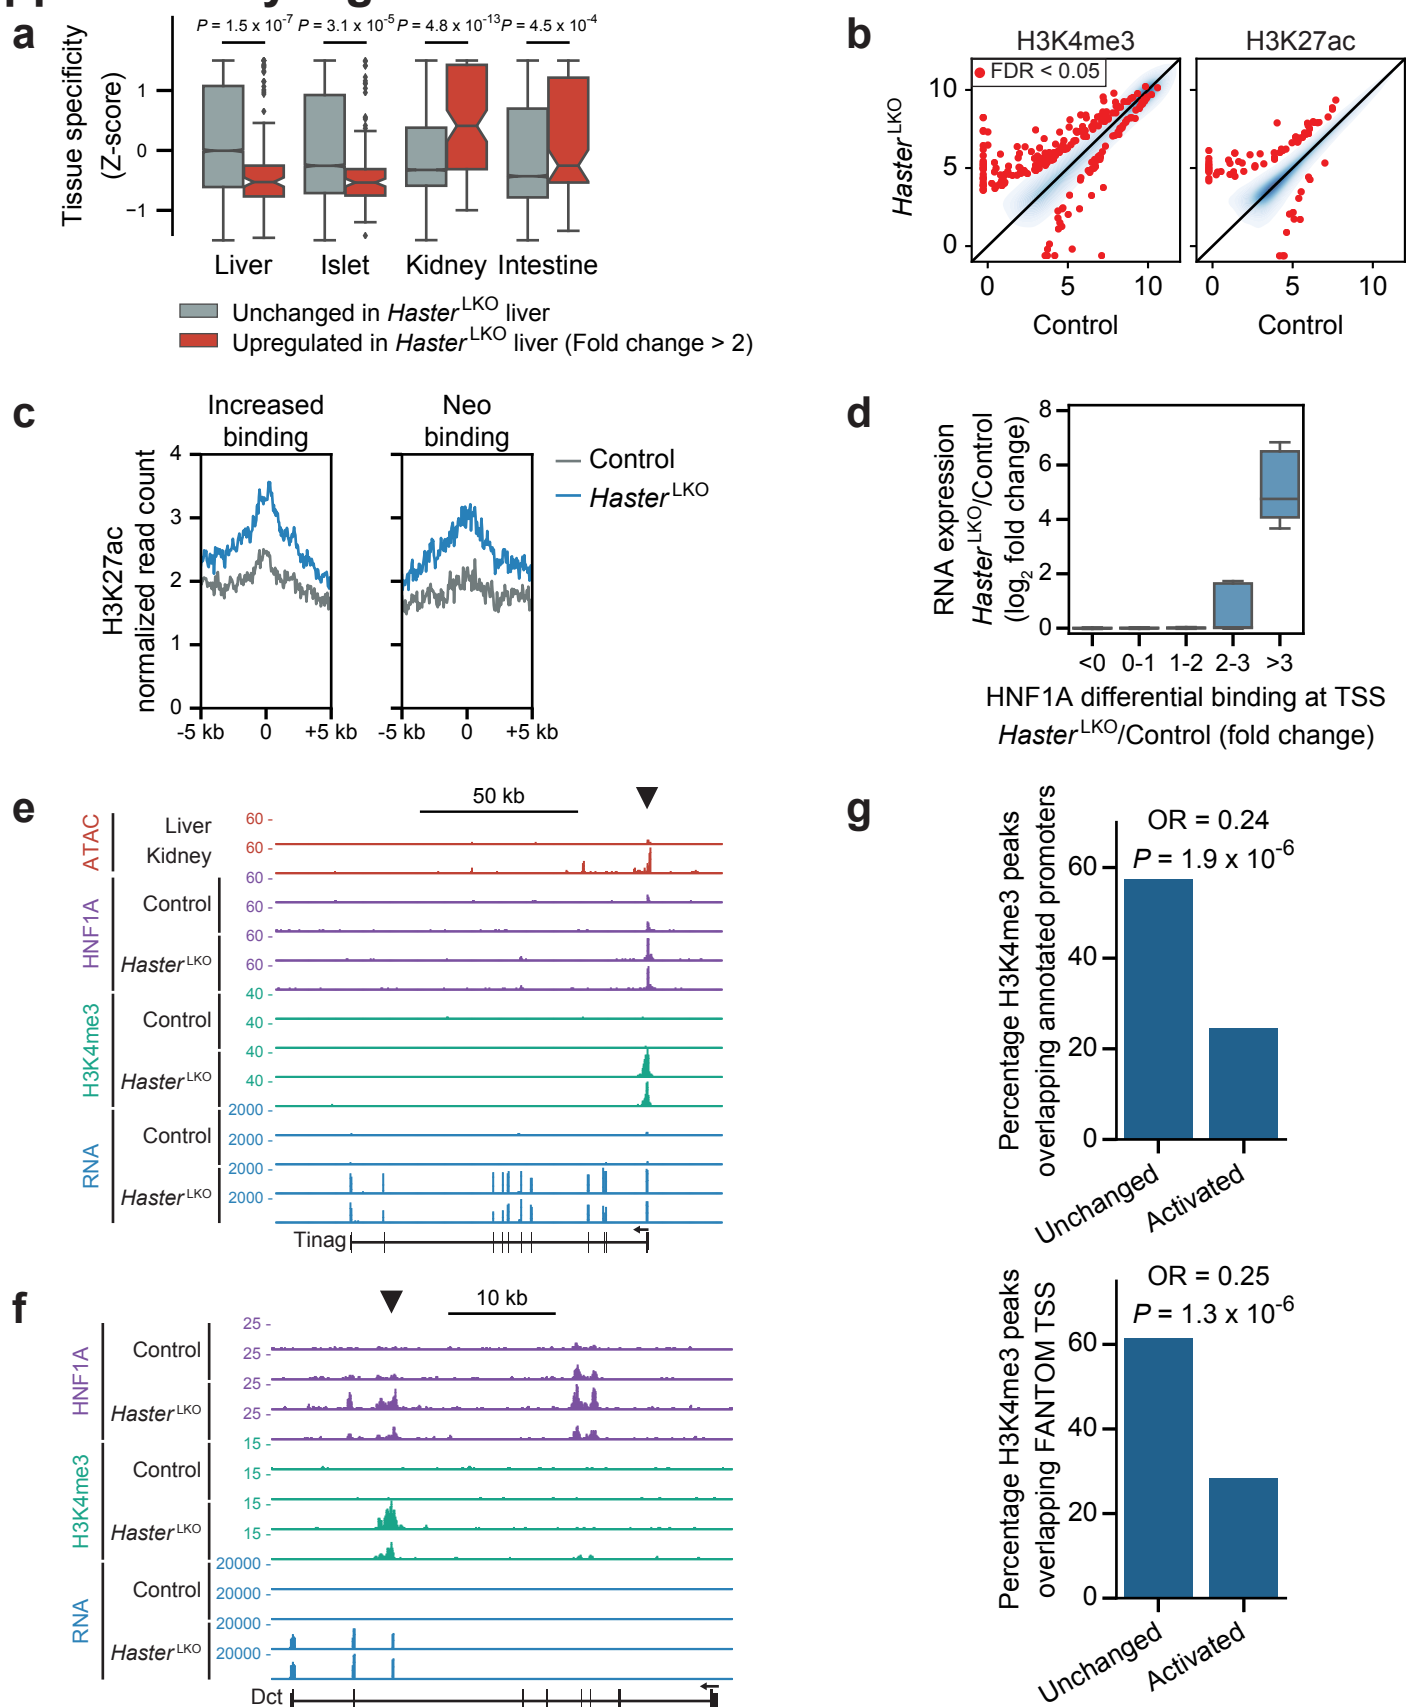

**Supplementary Fig. 6. *Hnf1a* upregulation perturbs HNF1A binding selectivity.** **a**, Tissue specificity of gene expression across HNF1A-expressing tissues for genes upregulated in *Haster*<sup>LKO</sup> liver. To quantify tissue specificity, for each gene and tissue we calculated a Z-score that represents the deviation of expression in that tissue relative to the average from all tissues. Box plots show medians and interquartile ranges. Wilcoxon rank-sum *P*-values. **b**, Liver H3K4me3 and H3K27ac in *Haster*<sup>LKO</sup> and control liver ( $\log_2$  normalized ChIP-seq read count;  $n = 3$  mice per genotype). Red, differential H3K4me3 or H3K27ac sites (FDR  $\leq 0.05$ ); blue, kernel density of differential H3K4me3 or H3K27ac sites with FDR > 0.05. **c**, H3K27ac at HNF1A-bound regions in *Haster*<sup>LKO</sup> and controls (average of  $n = 3$  mice per genotype). **d**, RNA fold change in *Haster*<sup>LKO</sup> vs. control liver of HNF1A-bound promoters for the different categories of HNF1A binding in *Haster*<sup>LKO</sup> liver. Lines are median and interquartile ranges. **e**, Examples of HNF1A neo-binding sites that lead to ectopic promoter and gene activation in *Haster*<sup>LKO</sup> liver. **f**, Ectopic activation of an intragenic promoter in *Haster*<sup>LKO</sup> liver ( $n = 2$  mice per genotype). **g**, Activated genomic regions that are bound by HNF1A and become active promoters in *Haster*<sup>LKO</sup>, but are inactive in control liver, overlap less frequently with annotated promoter and FANTOM5 CAGE transcriptional start sites, compared with HNF1A-bound active promoters in control liver (unchanged), suggesting that many may be aberrant promoters rather than repurposed from other cell types. Fisher's exact test odd ratio (OR) and *P*-values.

# Supplementary Fig. 7

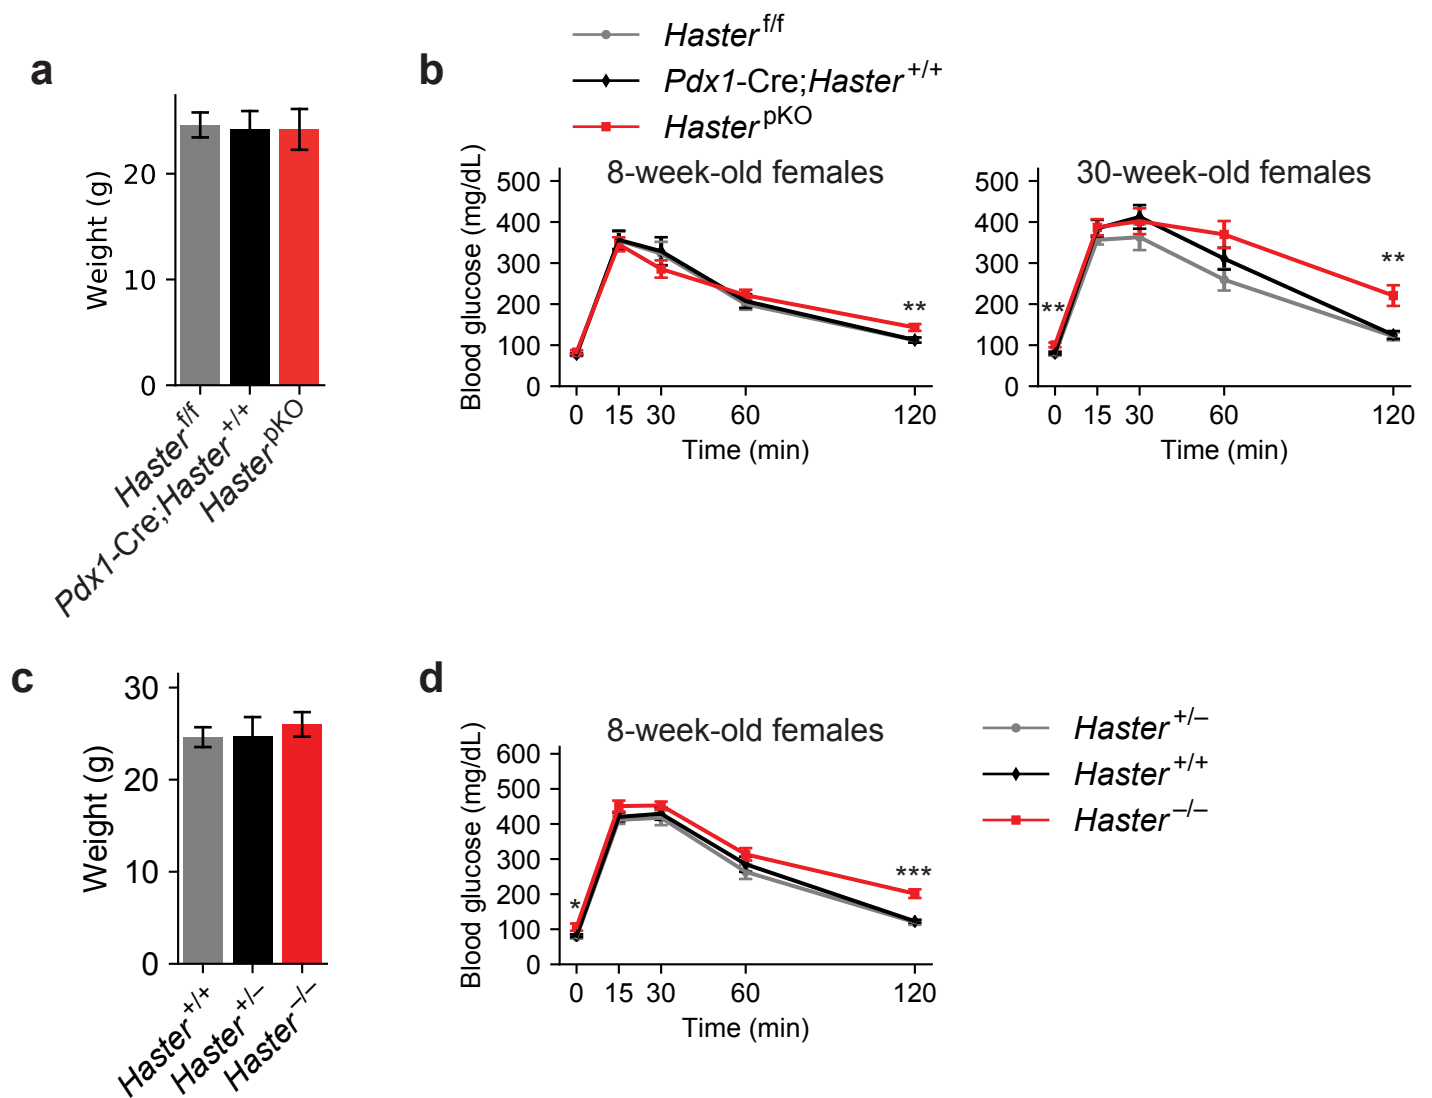

**Supplementary Fig. 7. Body weight of male *Haster* knockouts and glucose tolerance in female mice.** **a**, Body weight of males at 8 weeks of age. *Haster*<sup>pKO</sup> (n = 8), *Pdx1-Cre;Haster*<sup>+/+</sup> (n = 12) and *Haster*<sup>ff</sup> (n = 8). Mean ± s.d.. **b**, Intraperitoneal glucose tolerance test in 8-week-old and 30-week-old female *Haster*<sup>pKO</sup> (n = 9), *Pdx1-Cre;Haster*<sup>+/+</sup> (n = 10) and *Haster*<sup>ff</sup> (n = 10). Mean ± s.e.m., \**P* ≤ 0.05, \*\**P* ≤ 0.01 and \*\*\**P* ≤ 0.001 (two-tailed Student's t-test). **c**, Body weight of 8- to 10-week-old male *Haster*<sup>-/-</sup> (n = 9), *Haster*<sup>+/-</sup> (n = 12) and *Haster*<sup>-/-</sup> (n = 13). Mean ± s.d.. **d**, Intraperitoneal glucose tolerance test in 8- to 10-week-old females *Haster*<sup>-/-</sup> (n = 10), *Haster*<sup>+/-</sup> (n = 10) and *Haster*<sup>+/+</sup> (n = 12). Mean ± s.e.m., \**P* ≤ 0.05, \*\**P* ≤ 0.01 and \*\*\**P* ≤ 0.001 (two-tailed Student's t-test).

# Supplementary Fig. 8

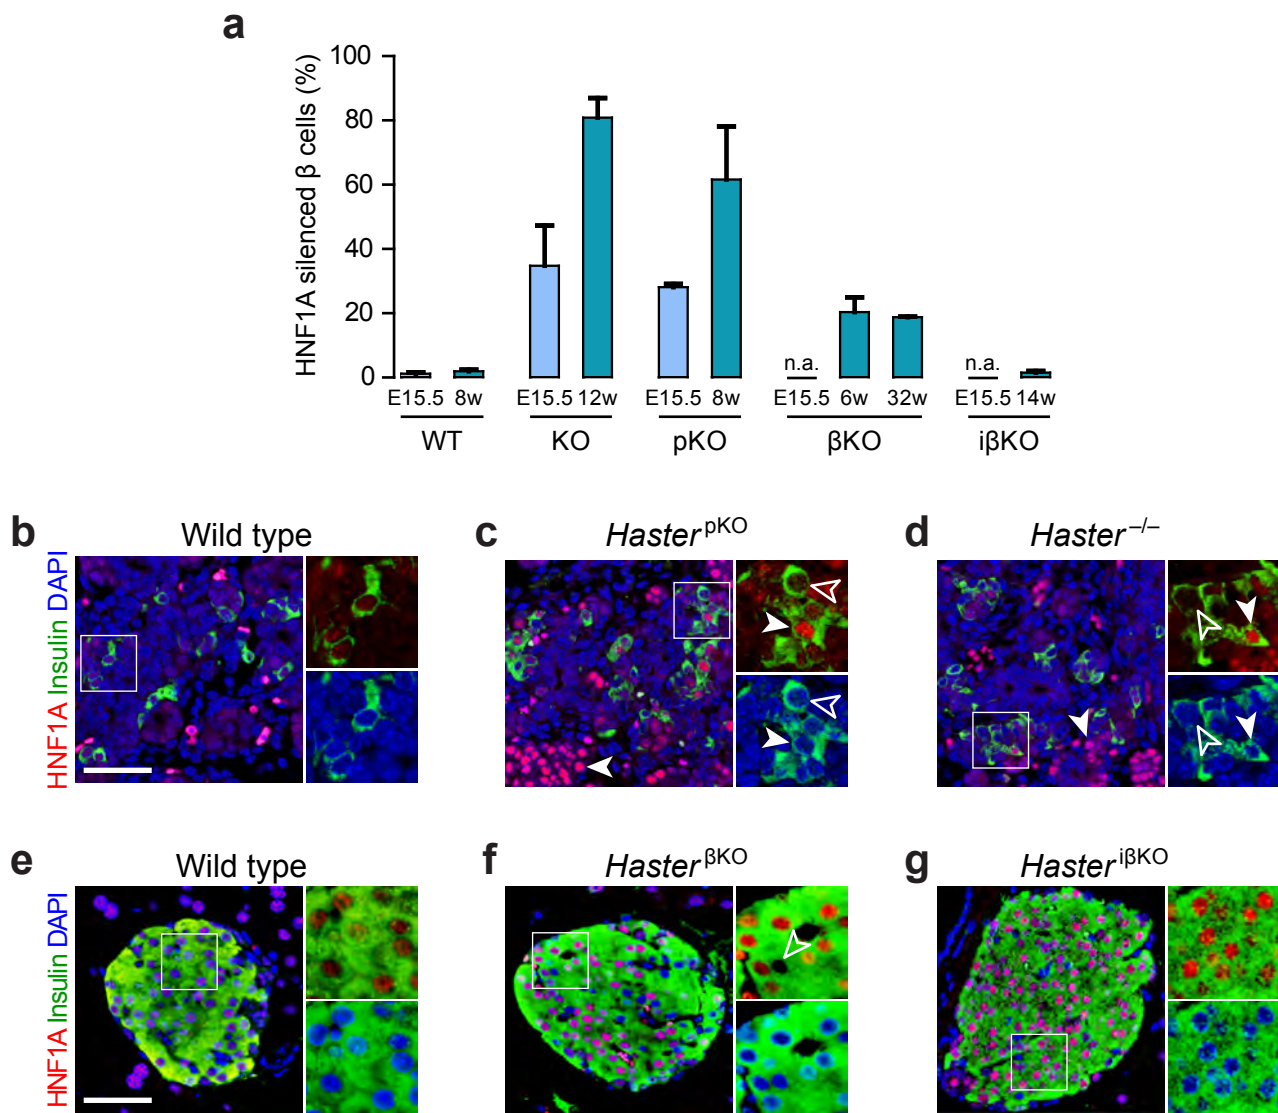

**Supplementary Fig. 8. Variegated HNF1A expression in *Haster* KO islet cells.** **a**, Relative quantification of HNF1A-negative  $\beta$  cells at the indicated age and genotype. Results show that HNF1A silencing correlates with time of *Haster* knockout, with higher silencing frequency after early deletion (*Haster* germline KO and *Haster*<sup>pKO</sup> models). HNF1A silencing increased with time in  $\beta$  cells from germline KO and *Haster*<sup>pKO</sup> models, but not when excision occurred in early  $\beta$  cells ( $\beta$ KO). No HNF1A silenced  $\beta$  cells were observed after *Pdx1*-Cre<sup>ERTM</sup>-based tamoxifen-inducible excision in adult  $\beta$  cells (*Haster*<sup>i $\beta$ KO</sup> model). n = 2 wild type embryos and n = 3 adult wild type mice; n = 2 *Haster*<sup>-/-</sup> embryos and adult mice; n = 3 *Haster*<sup>pKO</sup> embryos and adult mice; n = 2 *Haster* <sup>$\beta$ KO</sup> 6- and 32-week-old mice; n = 2 *Haster*<sup>i $\beta$ KO</sup> mice. Mean  $\pm$  s.d.. **b-d**, Immunofluorescence for HNF1A and insulin in E15.5 (**b**) *Haster*<sup>+/+</sup>, (**c**) *Haster*<sup>pKO</sup>, and (**d**) *Haster*<sup>-/-</sup> pancreas. Solid arrows, insulin cells overexpressing HNF1A; hollow arrows, insulin cells lacking HNF1A. **e-g**, Immunofluorescence for HNF1A and insulin in adult (**e**) wild-type, (**f**) *Haster* <sup>$\beta$ KO</sup> and (**g**) *Haster*<sup>i $\beta$ KO</sup> pancreas. Arrows point to HNF1A-negative  $\beta$  cells. Most  $\beta$  cells from *Haster* <sup>$\beta$ KO</sup> and *Haster*<sup>i $\beta$ KO</sup> islets overexpress HNF1A. Scale bar, 50  $\mu$ m.

# Supplementary Fig. 9

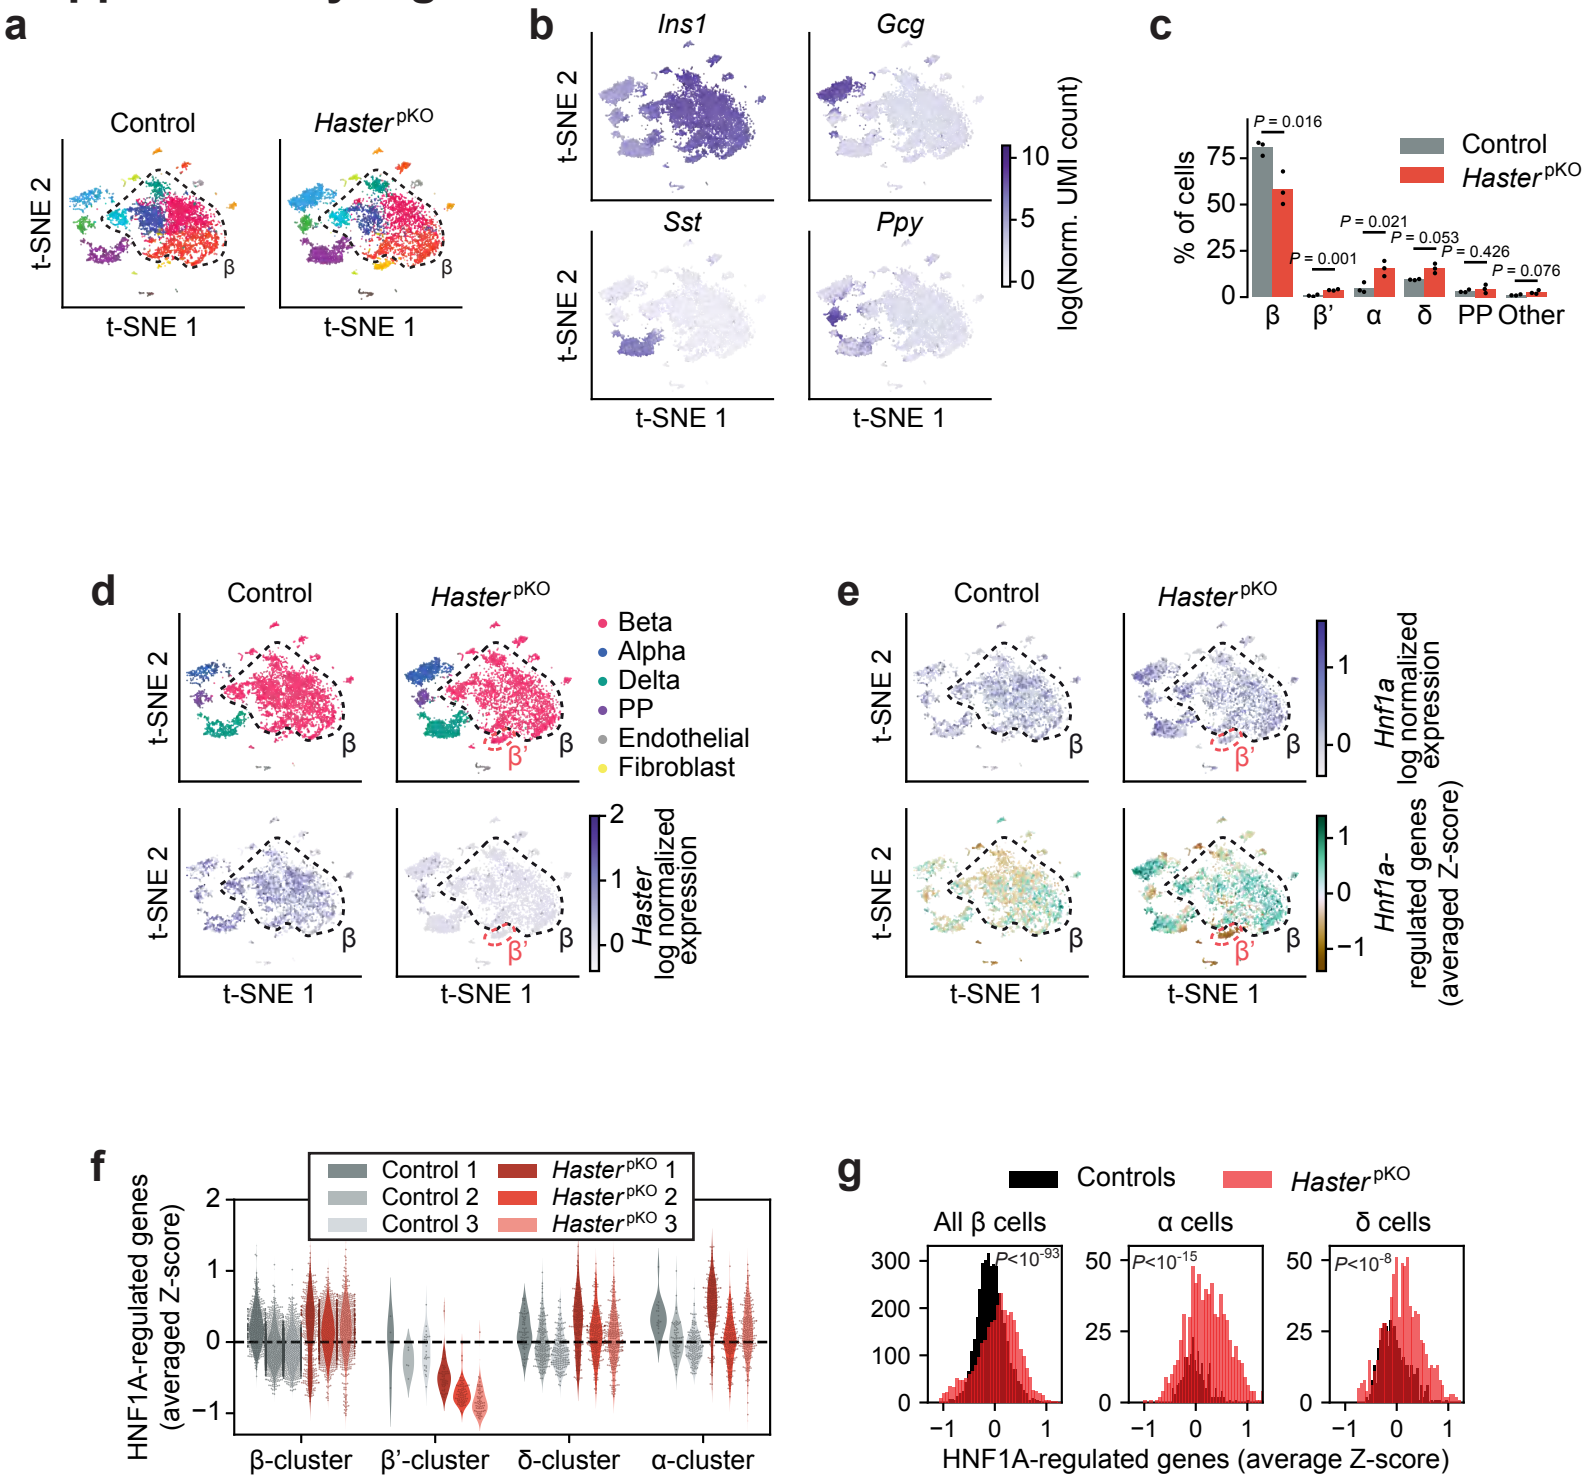

**Supplementary Fig. 9. Single-cell RNA-seq of *Haster*<sup>pKO</sup> islets.** **a**, scRNA-seq t-SNE plots of islet cells from female *Haster*<sup>pKO</sup> (4961 cells from triplicates) and controls (4646 cells from triplicates). A dotted line encompasses the main group of  $\beta$  cell clusters. **b**, t-SNE plots showing hormone expression. **c**, Relative proportions of islet cells. Each scRNA-seq cluster was assigned a cell type based on main hormone expression.  $\beta$  cell clusters were grouped, except for  $\beta'$  cell cluster that was only seen in *Haster*<sup>pKO</sup> cells. Mean  $\pm$  s.d., two-tailed Student's t-test. Note that these differences in cell composition are not per se expected to cause diabetes. **d**, *Haster* mRNA (log normalized UMI count) in different cell types of control and *Haster*<sup>pKO</sup> islets. **e**, *Hnf1a* mRNA (log normalized UMI count) in top panels; and expression of *Hnf1a*-regulated genes (average Z-score of log normalized UMI count) in bottom panels. The black dashed line highlights the main  $\beta$  cell cluster, showing increased HNF1A-regulated genes in *Haster*<sup>pKO</sup>, and the red dashed line highlights the  $\beta'$  cluster that is only observed in *Haster*<sup>pKO</sup> and shows decreased HNF1A-dependent gene expression. **f**, HNF1A-regulated gene expression (average Z-score) for different cell types in individual samples. **g**, Histograms showing the distribution of the HNF1A-regulated gene expression (average Z-score) for  $\alpha$ ,  $\beta$  and  $\delta$  cells. Bins 40. The variance of HNF1A-regulated gene expression increased in *Haster*<sup>pKO</sup>  $\alpha$ ,  $\beta$  and  $\delta$  cells, showing that HNF1A-regulated genes are either upregulated or downregulated in islet cells. Levene test *P*-values.



# Supplementary Fig. 10

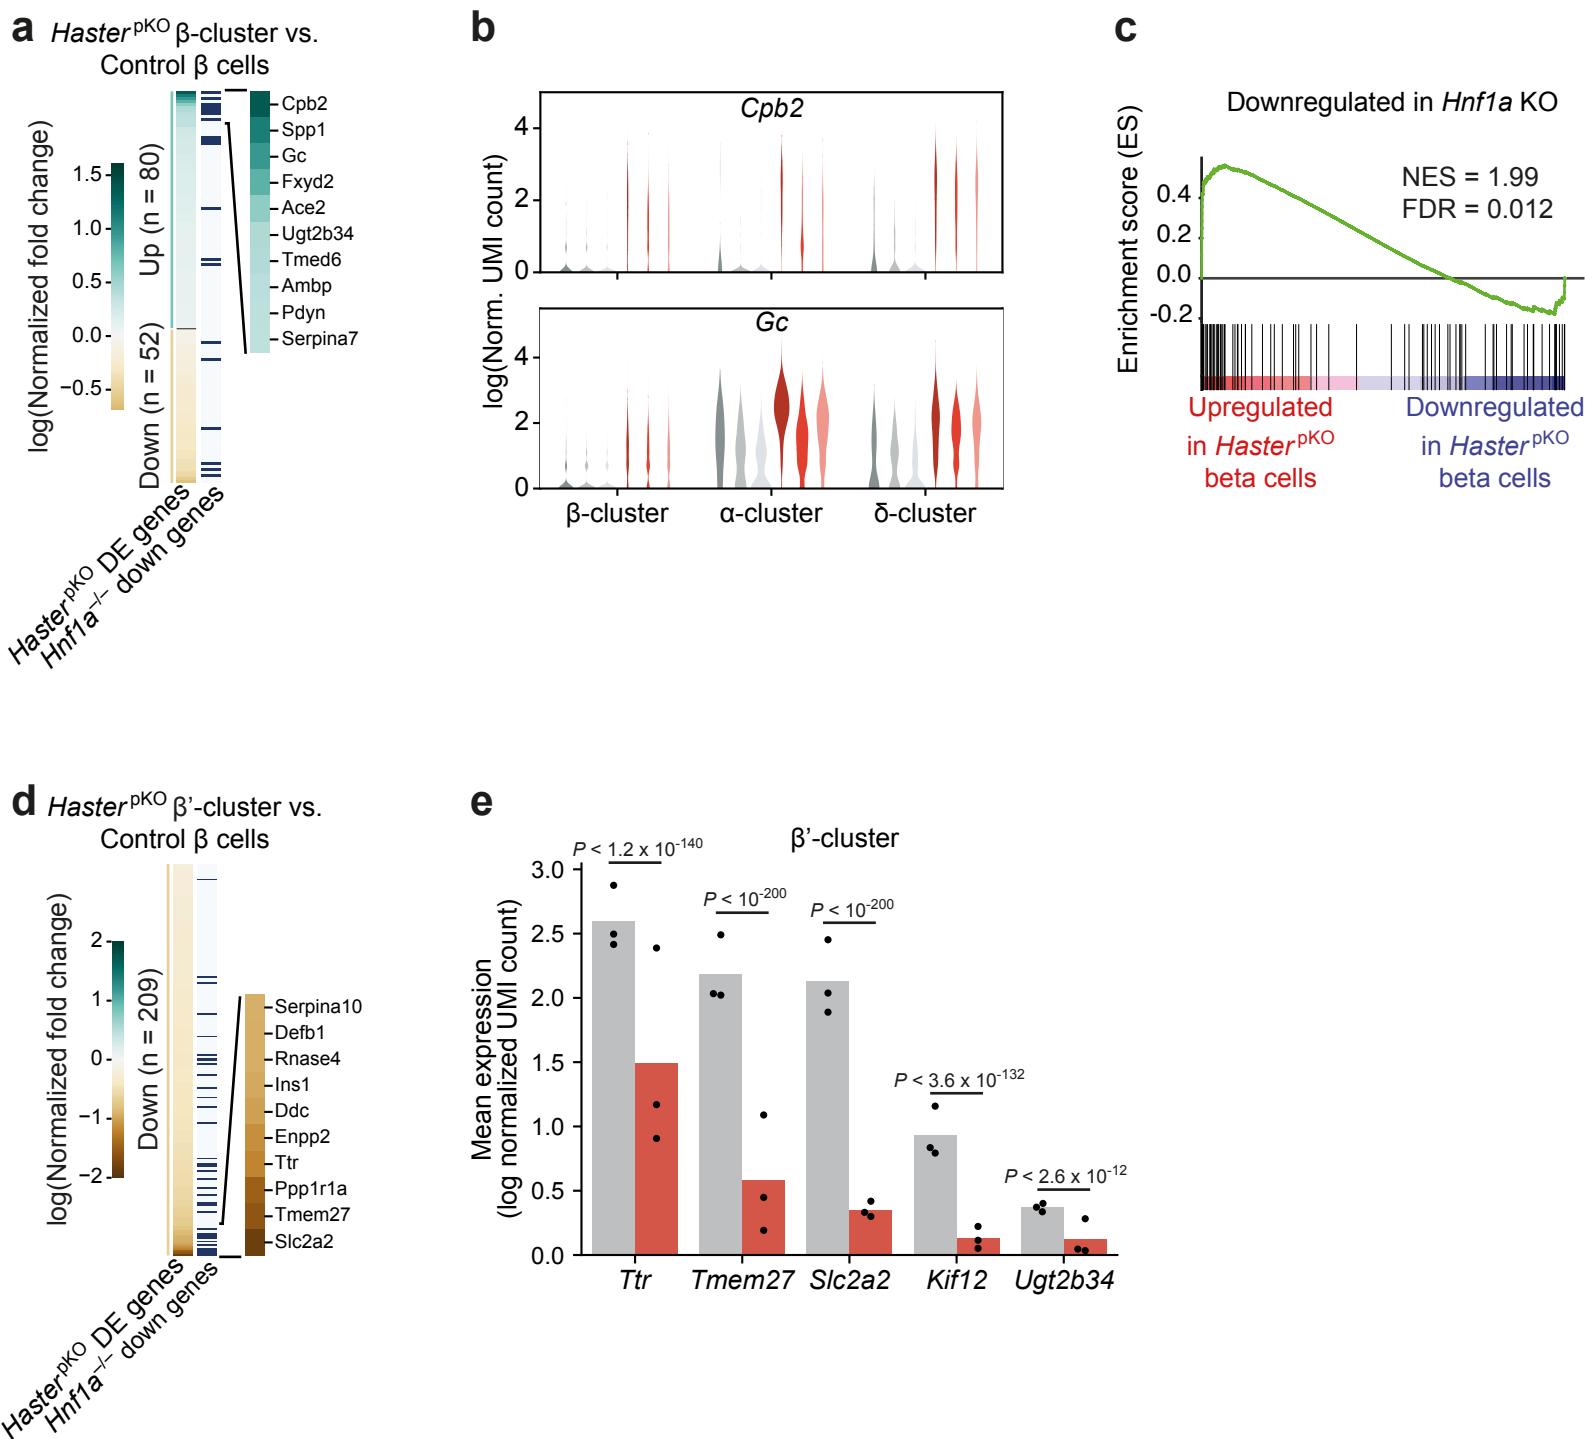

**Supplementary Fig. 10. Differential gene expression in *Haster*<sup>pKO</sup> β cells.** **a**, Genes differentially expressed in the major β-cell cluster of *Haster*<sup>pKO</sup> islets. Many of the most upregulated genes in *Haster*<sup>pKO</sup> islets are downregulated in *Hnf1a*<sup>-/-</sup> islets (blue horizontal lines). **b**, Examples of two genes that are known to be downregulated in *Hnf1a*<sup>-/-</sup> islets, *Cpb2* and *Gc*, and show increased expression in *Haster*<sup>pKO</sup> β cells. **c**, GSEA showing upregulation in *Haster*<sup>pKO</sup> β cells of genes downregulated in *Hnf1a* KO islets. **d**, Genes that are downregulated (combined  $P \leq 0.05$ ) in *Haster*<sup>pKO</sup> β<sup>1</sup> cluster cells are often downregulated in *Hnf1a*<sup>-/-</sup> islets (blue horizontal lines). **e**, Expression of selected genes that are known to be downregulated in *Hnf1a* KO islets and are downregulated in *Haster*<sup>pKO</sup> β<sup>1</sup> cells. Dots are medians of samples (log normalized UMI count) and bars are means of 3 replicates. Wilcoxon Rank Sum test,  $P$ -values for the different biological replicates combined with Fisher's method.

# Supplementary Fig. 11

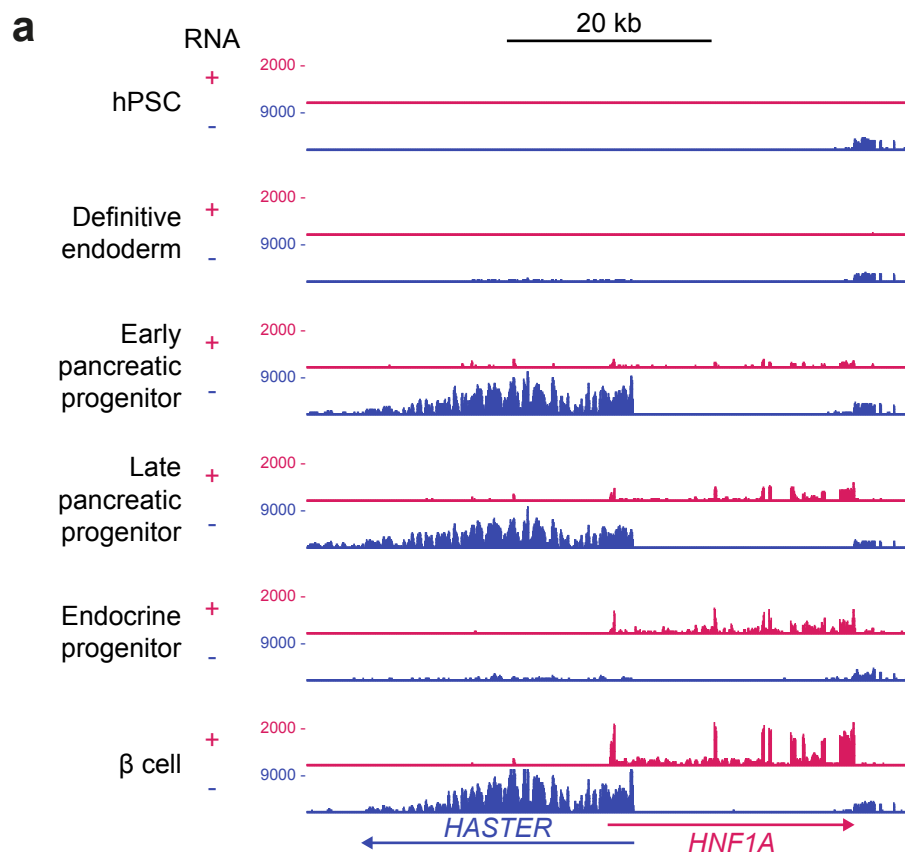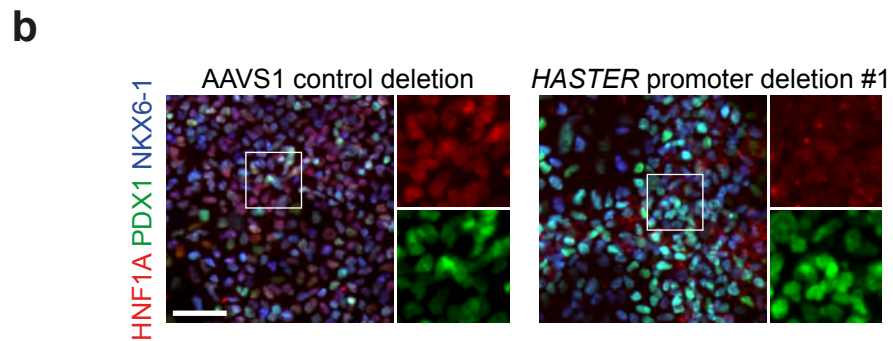

**Supplementary Fig. 11. *HASTER* deletion in human stem cell-derived pancreatic cells.** **a**, RNA-seq showing *HASTER* and *HNF1A* expression during hPSC differentiation to  $\beta$  cells (data from Alvarez Dominguez et al, Cell Stem Cell, 2020). **b**, Immunofluorescence for HNF1A and the pancreatic progenitor markers PDX1 and NKX6-1. Scale bar, 50  $\mu$ M.

# Supplementary Fig. 12

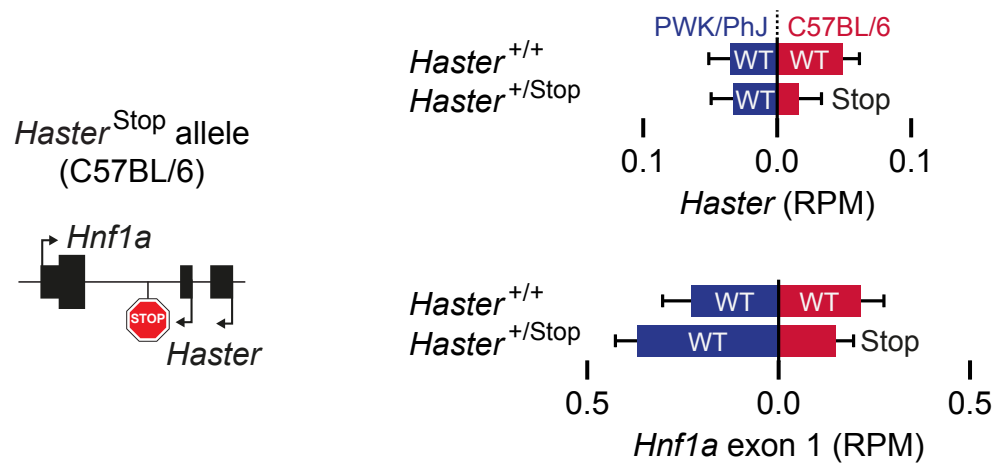

**Supplementary Fig. 12. *Haster* RNA or elongation are dispensable for the negative regulation of *Hnf1a* by *Haster*.** Strain-specific RNA expression from *Haster*<sup>+/stop</sup> C57BL/6;PWK/PhJ hybrid mice, showing that reducing *Haster* elongation in failed to increase *Hnf1a* expression from the same C57BL/6 allele.



# Supplementary Fig. 13

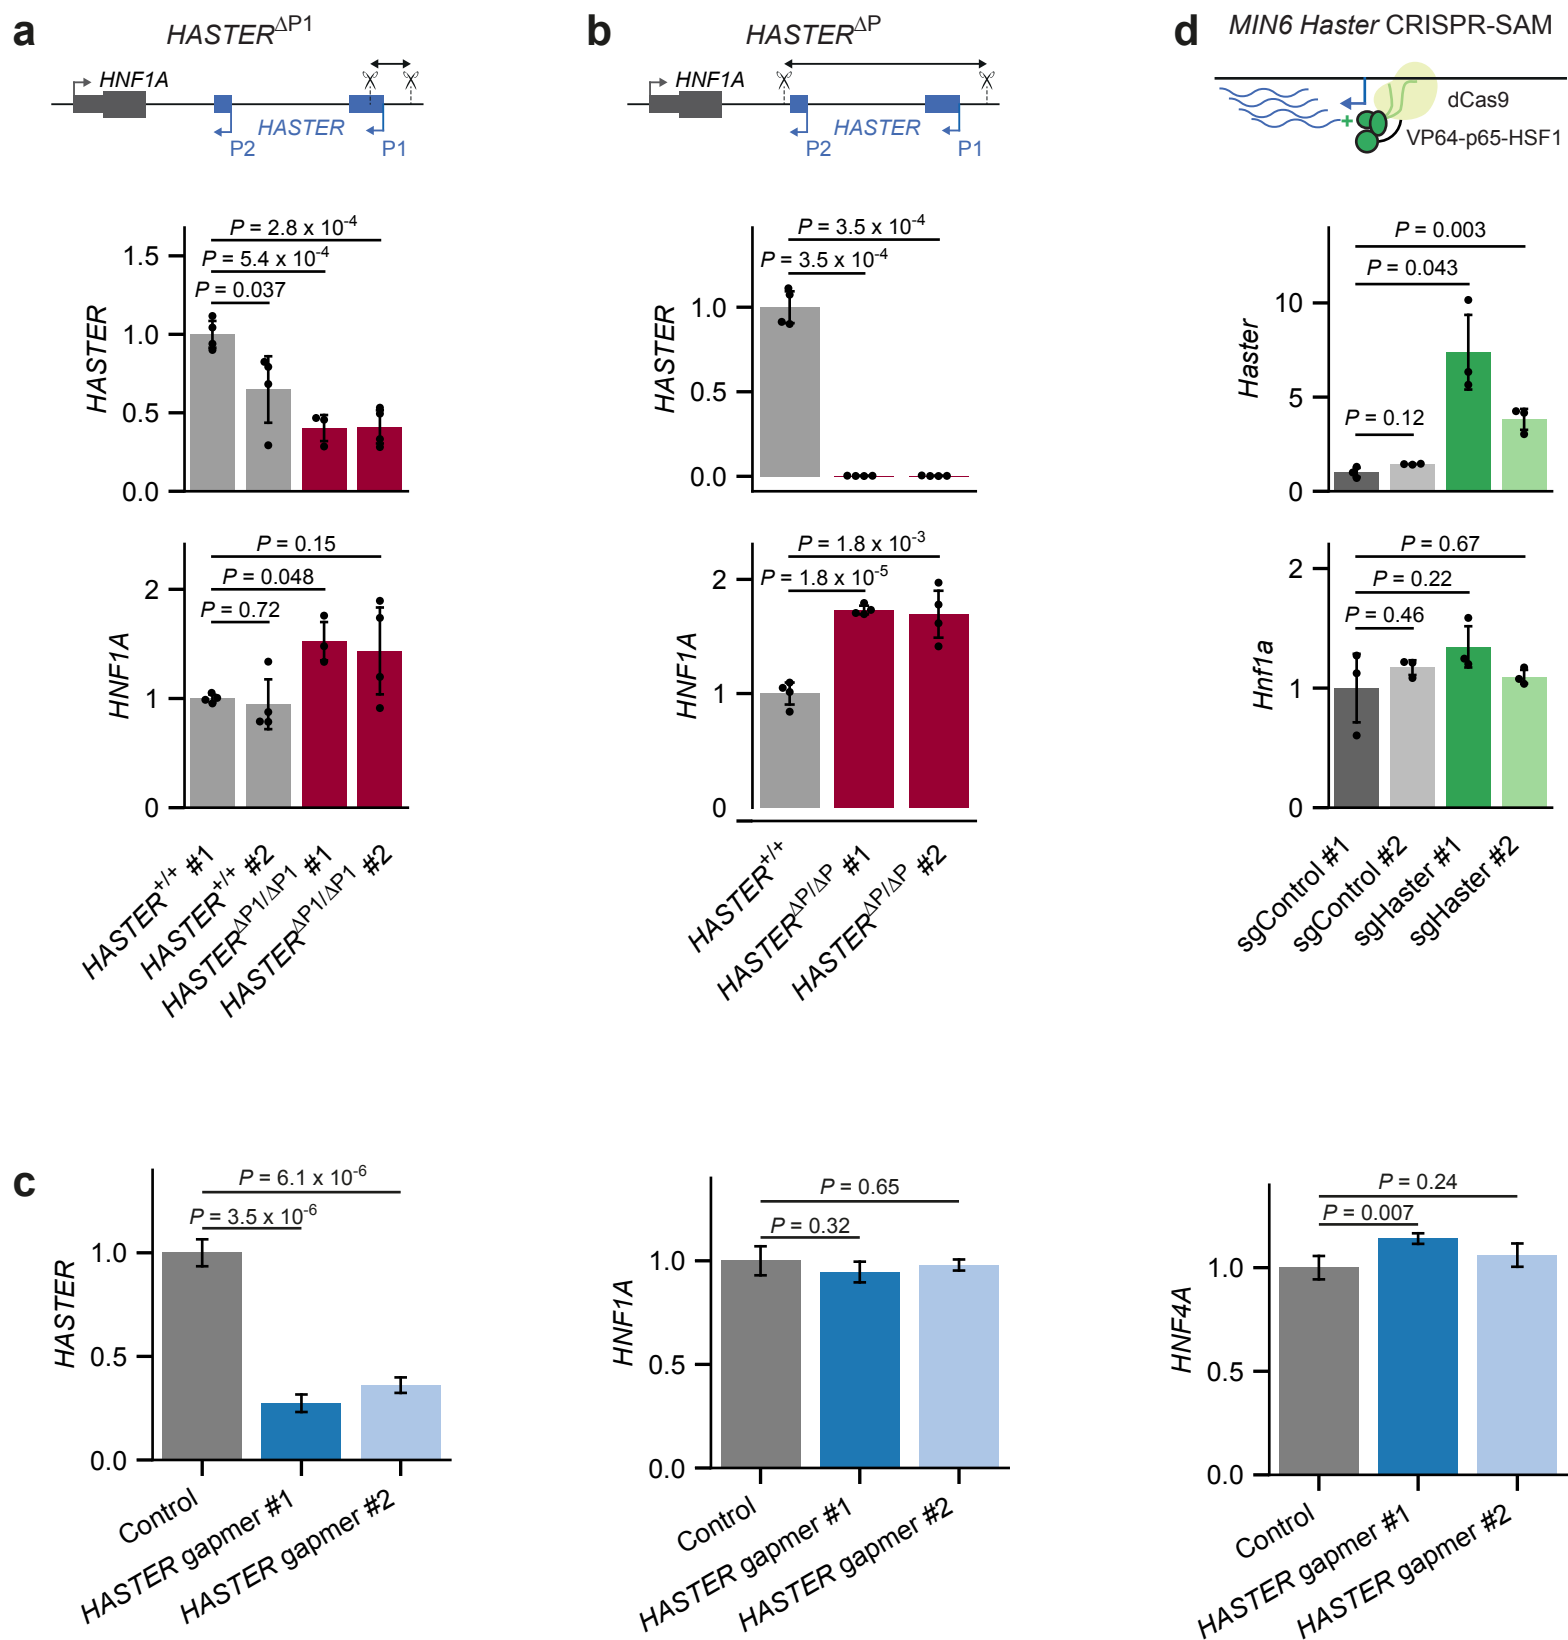

**Supplementary Fig. 13. *HASTER* perturbations in  $\beta$  cells.** **a,b**, *HASTER* and *HNF1A* RNA in EndoC- $\beta$ H3 cells with clonal homozygous deletion of (a) *HASTER* P1 promoter (*HASTER*<sup>ΔP1/ΔP1</sup>) or (b) *HASTER* P1 and P2 promoters (*HASTER*<sup>ΔP/ΔP</sup>). Deletion #1 and #2 were generated with independent pairs of sgRNAs, *HASTER*<sup>+/+</sup> clones were transfected with sgRNAs targeting the AAVS1 locus. *n* = 4 clones per deletion. **c**, Two sets of locked nucleic acid oligonucleotides (GapmeRs) were used to elicit *HASTER* degradation in EndoC- $\beta$ H3 cells, without significant changes in *HNF1A* or *HNF4A* mRNA. *n* = 3 nucleofections. **a-c**, Expression normalized by *TBP*. Mean  $\pm$  s.d., two-tailed Student's t-test. **d**, *Haster* activation by CRISPR-SAM in MIN6 mouse  $\beta$  cells had no effect on *Hnf1a* expression. *n* = 3 lentiviral transductions. Expression normalized by *Tbp*. Mean  $\pm$  s.d., two-tailed Student's t-test relative to the control #1 sgRNA.

# Supplementary Fig. 14

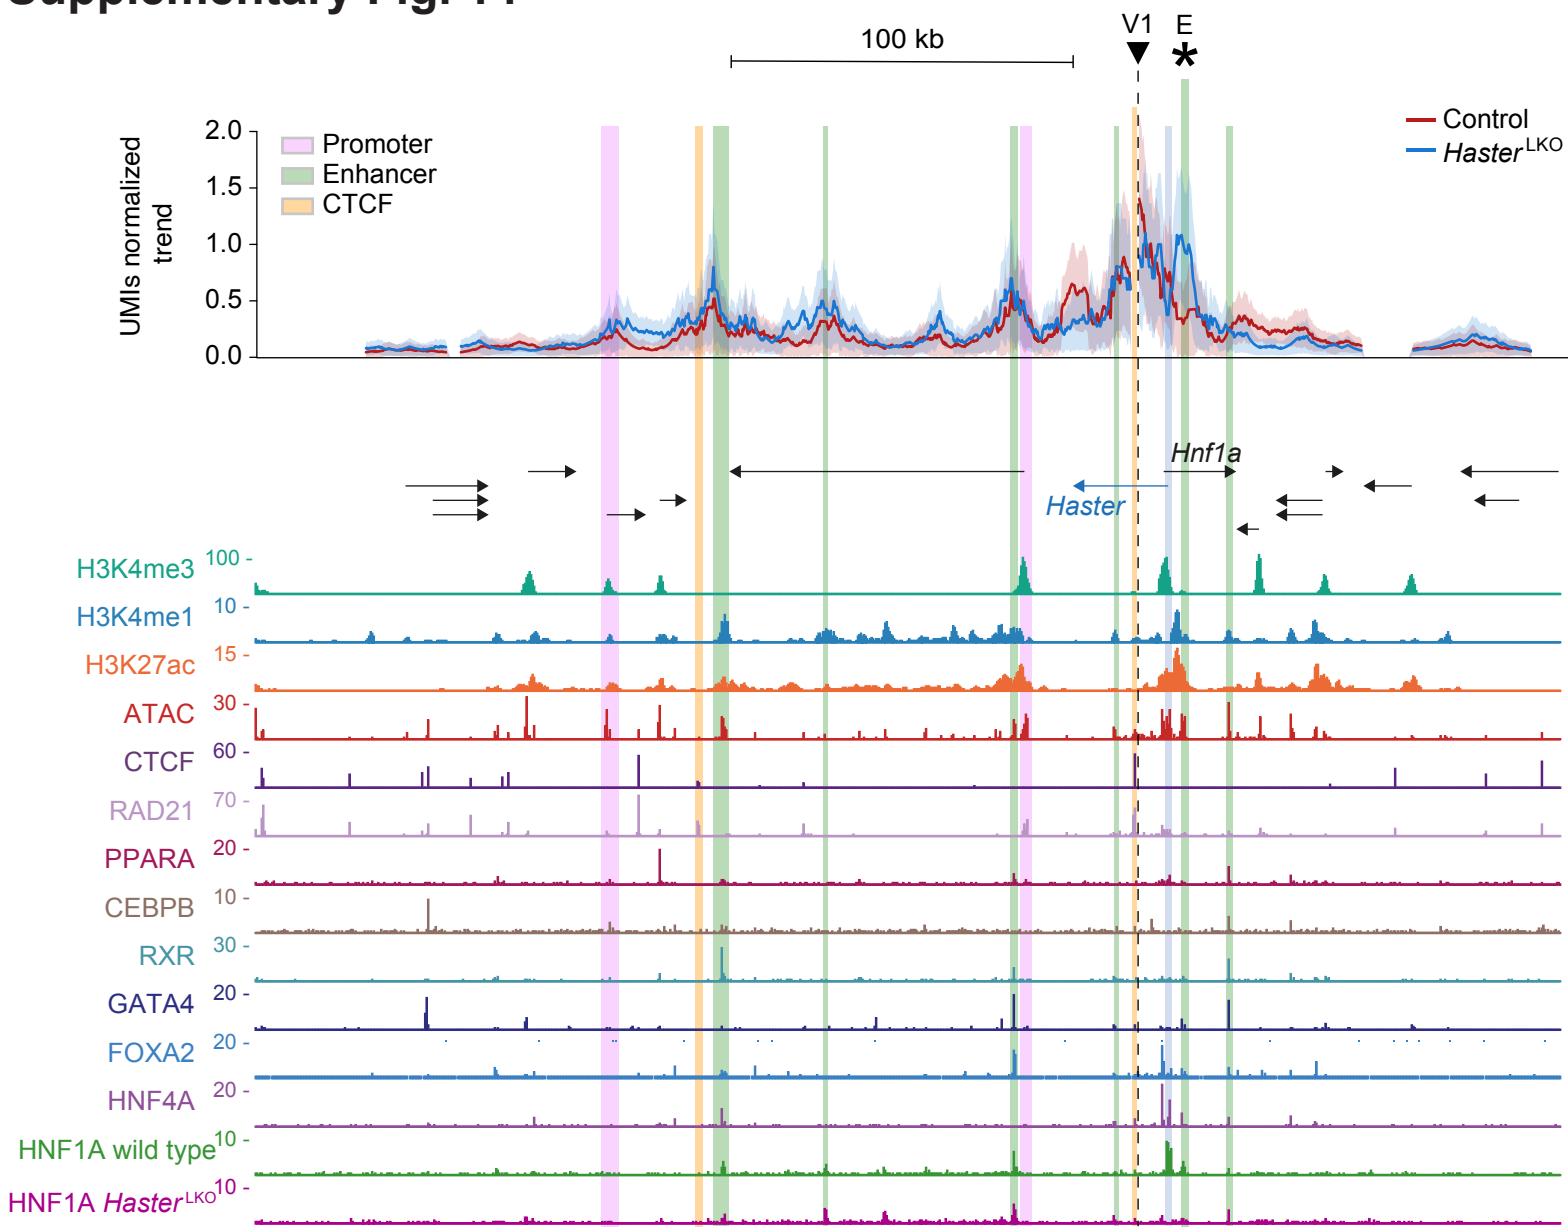

**Supplementary Fig. 14. Remodeling of local chromatin contacts in *Haster*<sup>LKO</sup> liver.** Top, UMI-4C profile trends using a viewpoint region upstream of *Hnf1a* (V1), near a CTCF-bound C site, in adult liver from n = 3 wild type (blue) or mutant (red) mice. Bottom, chromatin features and transcription factor binding in adult mouse liver. The *Hnf1a* upstream region contacts several enhancers, promoters and CTCF/cohesin sites in control and *Haster*<sup>LKO</sup> liver. The interaction between *Hnf1a* upstream region and E (asterisk) is increased in *Haster*<sup>LKO</sup> liver (see also Fig. 7). The region deleted in *Haster*<sup>LKO</sup> mice is highlighted in blue.

# Supplementary Fig. 15

**a**

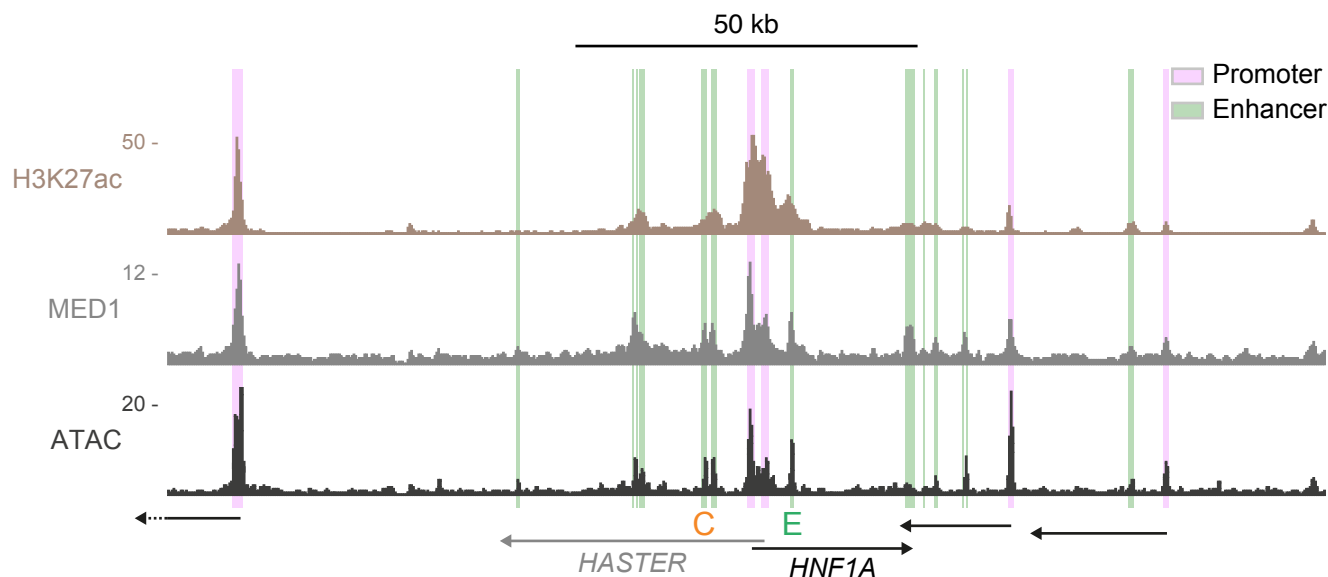

**b**

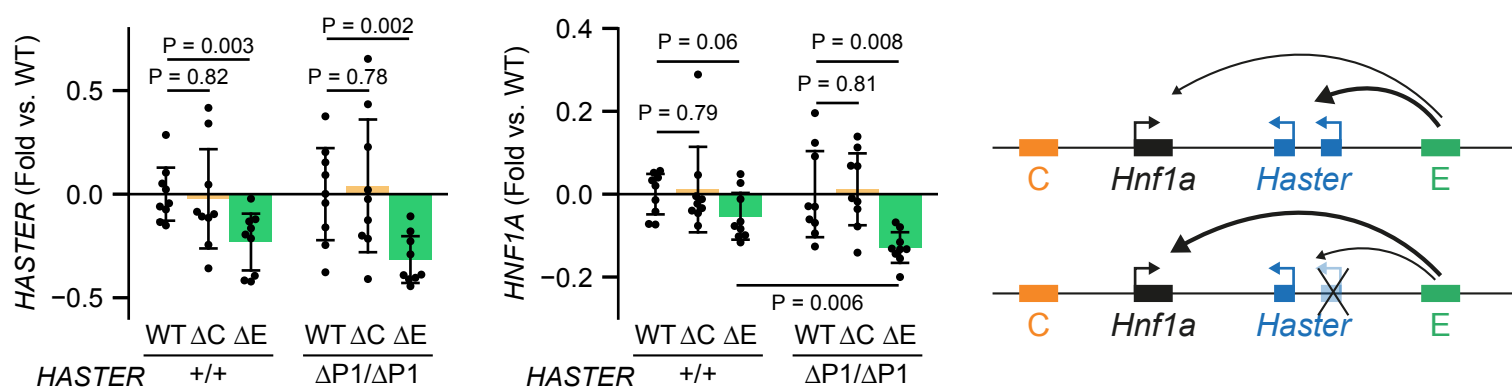

**Supplementary Fig. 15. E deletion partially prevents *HNF1A* mRNA increase in *HASTER* KO  $\beta$  cells.** **a**, Human islet chromatin marks showing the position of enhancers in the vicinity of *HNF1A*. **b**, *HASTER*<sup>+/+</sup> or *HASTER* <sup>$\Delta$ P1/ $\Delta$ P1</sup> clone #1 cells carrying targeted deletions in C ( $\Delta$ C), E ( $\Delta$ E) or sgGFP as control (WT). *HASTER*<sup>+/+</sup> control and E deletion are identical to **Fig. 7e**.  $\Delta$ C and  $\Delta$ E were polyclonal deletions. Results are expressed as fold-differences relative to the parental *HASTER*<sup>+/+</sup> or *HASTER* <sup>$\Delta$ P1/ $\Delta$ P1</sup> cells. This showed that  $\Delta$ C has no effect on *HASTER* or *HNF1A*,  $\Delta$ E had significant effects on *HASTER* but did not significantly affect *HNF1A* in wild type cells, yet showed a significant *HNF1A* reduction in *HASTER* <sup>$\Delta$ P1/ $\Delta$ P1</sup> cells. This is shown in cartoon form in the right panel, whereby E predominantly enhances *HASTER* transcription, but enhances *HNF1A* in the absence of *HASTER*. Pool of  $n = 3$  independent experiments with 3 pairs of sgRNAs for each deletion. TBP-normalized mean  $\pm$  s.d.; two-tailed Student's t-test.
